# Supplementary material for: Combined hearing and vision screening programs: A scoping review
Source: Front Public Health. 2023 Mar 14;11:1119851. doi: 10.3389/fpubh.2023.1119851 (PMC10043331; doi:10.3389/fpubh.2023.1119851)
Supplement: Supplementary file 2 [file Table_2.xlsx]

## Sheet: Sheet1
Author Details	Publication Date	Title	Primary Database	Study design	Population: Adult/children	Sample size	Setting	Country	Income bracket of country	Type of test - Vision	Type of test - Hearing	Device(s) used	Test facilitator or Test personnel	Referral criteria: vision & hearing	Outcomes: referral rates, follow-up rates, program cost, test duration, sensitivity, specificity	Benefits of combined screening	Challenges/barriers to combined screening
Bright et al.19	2020	Rationale and feasibility of a combined rapid assessment of avoidable blindness and hearing loss protocol	References	Secondary data analysis of population-based cross-sectional survey	Adults (50+ years)	256	In a quiet room in participants' homes	Malawi	Low-income	Tumbling E	hearTest	Vision: Tumbling E chart Hearing: hearTest mobile application on smartphone with circumaural noise attenuating headphones (Seinnheiser HD280)	Hearing screening: audiologist or trained nurse. Vision: trained CHW	Hearing: PTA >= 41 dBHL in better hearing ear. Vision: Visual acuity of 6/12, then referred for undilated eye examination using an Archlight to assess cause.	Feasibility in terms of test duration and associated costs. Test duration: hearing assessment median time per person 16.7 minutes (IQR = 5.2) (excluding consent); vision assessment median time per person 4 minutes (IQR = 5.0). Median duration for combined vision and hearing assessment, 20.5 minutes (IQR = 5.7) per person. Possible to conduct combined assessment on 30 people per day. Cost: combine…	Combined screening is feasible and well accepted by participants and personnel. It is cost- and time efficient (compared to conducting two standalone tests/screenings) and resource-efficient and broadens potential funding.	Eye examination may add up additional time to vision screening component, therefore it may take more time to conduct than hearing screening component. Recommend additional team member to assist with vision component or team member of hearing component can assist with uploading/documenting data
Bubbico et al.34	2021	Hearing and Vision Screening Program for newborns in Italy.	Pubmed	Descriptive survey	Newborns	762627	Maternity hospitals: nursery and NICU	Italy	High-income	Red Reflex test	TEOAE; AABR	Hearing: OAE and AABR equipment (not specified) Vision: Ophtalmoscope	Hearing: nurses, technicians, pediatricians. Vision: pediatricians or ophtalmologists	Vision: two-stage screening: first screening before discharge, if not "pass" (thus not red reflection and not identical in both eyes) referred for opthalmologic evaluation. Hearing: Two-stage screening. First stage on day 2 after birth. Referral for second stage screening if not "pass" response from both ears (second screen 3-4 weeks later); fail second stage referred for audiologic evaluation.	Vision: overall referral rate 0.48%; rate of loss to follow-up 0.75% Hearing: Overall mean referral rate 3.63%	Combined screening is a multi-disciplinary approach to sensory disability. Implementation of simultaneous hearing and vision screening increased the coverage of both screening tests.	NR
Clinton55	1979	School hearing and vision screening-referrals.	Scopus	Not specified/not reported	Preschool children	254725	School (day-care, kindergartens, preschool)	USA	High-income	Tumbling E	Pure tone audiometry	Tumbling E chart; Puretone portable audiometer	Trained volunteers, vision and hearing consultant, school nurse or public nurse	Hearing: Initial screen fail (dont hear 1/more frequencies at 20 dB), rescreened 4 weeks later, still difficulty then audiogram with hearing thresholds at 500-6000 Hz obtained and written notice sent to parents suggesting to contact child's physician. Vision: preschool child 20/30 in each eye considered normal; older child 20/20 considered normal; abnormal scores, rescreened 2-6 weeks later if st…	254725 children screened: 9749 referred for further evalulation (notices sent to parents) and 1492 went for further examination (follow-up data is limited; assumed more children did attend further examinations) Cost (combined screening): 36c per child	Cost only 36c per child screened, retested and referred. This includes all expenses eg travel for the consultants, forms, equipment for loan and salaries for paid personnel. Major benefit for public health service	Follow-up on referrals?
Crowley et al.49	2005	A model preschool vision and hearing screening program	Scopus	Not specified/not reported	Children	181	Preschools: a room with two testing stations (one station for vision screening, one station for hearing screening)	America	High-income	Lea visual acuity test; Random Dot E stereopsis test. Eye examination: check of extraocular movements and red reflex, corneal light reflex, and cover-uncover test	Otoscopy; Pilot Audiometer (spondaic words)	Pilot audiometer	Nursing students under supervision of a pediatric nurse practitioner	NR	Rescreen, referral Vision: 28 children (15.5%) referred after initial screen (abnormal vision screen results). Follow-up rate: 20/28 attended rescreen (71.4%); 9 children (4.9%) had abnormal results and referred to primary care provider. Hearing: 38 children (21%) referred after initial screen (abnormal hearing test results) of which 3 were immediately referred to primary health care provider due…	Rescreening resulted in lower referral rate to primary care provideres - thus reducing number of unnecessary follow-up visits and reducing burden on primary care providers, traveling (economical benefit)	NR
Eksteen et al.11	2019	Hearing and vision screening for preschool children using mobile technology, South Africa.	Pubmed	Descriptive feasibility study	Children (4-7 years)	8023	Preschool centres: Suggested strategies to minimize effect of background noise levels in preschool centres: use of mHealth technologies that monitored noise for quality control; conducting test in neighbours’ homes if the centre was too noisy, and screening at 30 dB (instead of 25 dB) hearing level at 1 kHz.	South Africa	Upper-middle (community is classified as low- and middle income)	Peek Acuity app: Tumbling E	hearScreen app; second screening - hearTest app; otoscopy	mhealth software applications on smartphones; for hearing screening smartphone connected to supra-aural Sennheiser HD280 headphones	Trained CHWs	Initial vision screening and rescreening: a visual acuity of less than 0.3 LogMAR (logarithm of minimum angle of resolution) in both eyes, or less than 0.4 Log- MAR in one eye regardless of acuity in the other eye. Referred to primary health care facilities for a diagnostic optometric evaluation. Hearing initial screening: > 25 dB HL at frequencies tested (1, 2, and 4 kHz), referred for rescreen.…	Vision: 2.1% referred after initial vision screening Hearing: 5.4% referred after initial hearing screening; Referral: Parents informed about referral by letter and reminded by telephone the day before diagnostic evaluation. Combined test duration (mean): 158.6 seconds (< 3 minutes); hearing = 66.8 sec; vision = 91.8 sec Cost: $ 5.63 p/child (combined screening) Follow-up services and interventio…	mHealth-supported CHW-delivered hearing and vision screening in preschool centres provided a low-cost, acceptable and accessible service, contributing to lower referral numbers to resource-constrained public health institutions.	Challenges and mitigation strategies - see Box 1 in article: Background noise signficant affects screening outcome: increasing referral hearing level from 25 to 30 dB at 1 kHz (most failed hearing tests at which background noise levels were excessive were recorded at 1 kHz)
Eksteen et al.39	2022	Prevalence and characteristics of hearing and vision loss in preschool children from low income South African communities: results of a screening program of 10,390 children	Scopus	Descriptive cross-sectional study	Children (4–7 years; mean age 5.7)	10390	Preschools	South Africa	Upper-middle (Community is classified as low- and middle income)	Peek Acquity app (Tumbling E optotype)	hearScreen. Follow-up : otoscopy, hearTest	Smartphones with point-of-care validated hearing and screening applications	Hearing: trained CHWs; audiologist. Vision: trained CHWs	Initial screening Vision: Visual acuity of < 0.3 LogMAR in both eyes or < 0.4 LogMAR in one eye regardless of acuity in other eye. Initial screening Hearing: Thresholds at 25 dB HL at 1,2 and 4 kHz (September 2017 - December 2018) and thresholds at 30 dB HL at 1 kHz and 25 dB HL at 2 and 4 kHz Follow-up assement vision (re-test): Visual acuity of < 0.3 LogMAR in both eyes or < 0.4 LogMAR in one e…	Failed screening: follow-up assessment at their preschool. Then if needed, referred to nearest clinic for intervention. Overall screening referral rate from hearing screening: 5.6% (581) children and from vision screening 4.4% (453) children. 0.7% (72) children failed both initial hearing and vision screening. Follow-up rates for hearing test: 88.5% (514) children; 41.3% (240) presented with hear…	Hearing and vision loss commonly co-occur. The use of of mHealth provides more opportunities for sensory screening at preschools in the community, to facilitate increased access to hearing and vision services. Community-based service-delivery model, where trained CHWs are utilized to screen both hearing and vision using the same smartphone, has been shown to be efficient and low-cost. Furthermore…	NR
Elliott et al.36	2010	The feasibility of a community-based mobile telehealth screening service for Aboriginal and Torres Strait Islander children in Australia.	References	Descriptive feasibility	Children ( ages 0-16)	442	A van parked at schools and daycare centres	Australia	High-income	PattiPics Chart; Precision Vision, cover test (Ishihara), occluder, Randot Stereo Test (Stereo Optical), glazed flippers þ 1.50 (Cyclopean Design), and color vision test made easy (Waggoner).	Otoscopy; tympanometry; pure tones; video-otoscopy	Vision: PattiPics Chart; Precision, Ishihara, occluder, Stereo Optical, glazed flippers þ 1.50 (Cyclopean Design), and color vision test made easy (Waggoner). Hearing: welch Allyn otoscope,GSI 38, Auto Tymp, GSI 68 Diagnostic Audiometer, and video-otoscopy (Inline System)	Trained Aboriginal health worker	Hearing: Tymps- Type B,C, discharge, perf, grommets = refer. Pure tones- fail = 50dB or worse. Vision: Visual acquity = Pass (4–7 years)=6/7.5–6/9 , Pass (7–15 years)= 6/6–6/7.5, Fail= 6/9–6/18 and worse than 6/18. Flipper test: Fail= 6/6–6/6.75. Cover test: Fail =arge amount of movement (esophoria and exophoria) or turned eye (esotropia and exotropia). Motility: Fail= eyes misalign through all d…	Vision: referred via the database to the optometrist for eye test criteria and referral pathways. Hearing: tele-otology clinics were completed with an ENT specialist in Brisbane.	Instead of children and families having to travel to health centers or regional hospitals for health screening, our service provides easy access within their own local community.The specialist ratings of the images collected by the health worker indicated that an adequate-quality image can be obtained and presented for sufficient review online.	The cost and long-term impact of this community-based screening service have not been evaluated as part of this feasibility study
Graue-Hernández et al.52	2019	Self-reported hearing loss and visual impairment in adults from Central Mexico	Scopus	Population-based cross-sectional	Adults (50 years and above)	1511	Participants' homes	Mexico	Upper-middle	Tumbling E chart with and without pinhole correction	Spanish Hearing Impairment Inventory for the Elderly (SHIIE)	Vision:Tumbling E chart, Hearing: Questionnaire	Trained and standardized interviewers	Hearing: A score <10 indicates normal hearing and a score ≥10 suggests hearing loss. In individuals with a total score ≥10, and additional question (“Can you understand when someone is speaking to you on the telephone?”) was used to determine the degree of hearing loss. A “Yes” answer indicated mild hearing loss; “Sometimes”, moderate hearing loss; and “No” severe hearing loss.Vision: Visual acui…	Hearing loss was measured using the validated Spanish Hearing Impairment Inventory for the Elderly (SHIIE),The questionnaire has an internal consistency of 0.956 and a sensitivity and specificity of 80 and 58%, respectively.	NR	Hearing loss was measured through self-report
Kataoka-Yahiro et al.56	2001	Learning-Service Community Partnership model: A pediatric program evaluation	References	Not specified/not reported	Children (ages 2-4)	132	Child care centres	America	High-income	Denver Eye Screening Test; cover test and pupillary light reflex.	Pure Tone Audiometry	Vision: Picture card; Hearing: Audiometer	Trained nursing students: screening conducted under supervision	Hearing: No response to a tone at 20dB	NR	provides effective high-quality and low-cost health care services for preschool children,	NR
Knox et al.35	2018	Screening for developmental disabilities in hiv positive and hiv negative children in south africa: Results from the asenze study	Scopus	Longitudinal epidemiological study	Children (aged 4-6)	1330	Homes (questionnaire) and study centre (screenings)	South Africa	Upper-middle	Tumbling E; Snellen eye chart	Distortion Product Otoacoustic Emissions; tympanometry	Snellen chart, OAE	Medical doctor	Tympanometry conducted if DPOAE failed	Only further referral for hearing testing. Among HIV-positive children, the sensitivity and specificity of the TQ for serious disability was 100.0% and 51.2%, respectively. The positive predictive value was 12.5% and the negative predictive value was 100.0%. Among HIV-negative children, the sensitivity and specificity of the TQ for serious disability was 90.2% and 63.9%, respectively. The positiv…	TQ is acceptable as a low-cost and rapid screen for serious disabilities in developing settings, we observed a low positive predictive value among HIV positive children that was within the range of what has been previously observed (3–15%).	the TQ did not include questions on child behavior, it would not identify behavioral difficulties.
Kohler57	1977	Physical Health of 7-yearl Old Children. An Epidemiological Study of School Entrants and a Comparison with Their Preschool Health	Scopus	Epidemiological	Children (7 years)	649	School (quiet room). Unavoidable environmental noise was present in the testing room and therefore lower frequencies could have a higher normal limit ( 25dB as opposed to 20dB).	Sweden	High-income	Linear E-chart (Oculus)	Pure tone audiometry	Linear E chart; audiometer (Tegner PTA-9) with earphones	Nurse	Vision: Visual acuity 0.9 or less on one or both eyes referred to opthalmologist. After professional examination visual deviations were classified according to impact on health and function and need for care Hearing: Impairment at two or more frequencies (thresholds > 20 dB at 1-8 kHz; > 25 dB at 250-500 Hz) on same ear referred to audiologist for further evaluation. According to professional eva…	Vision: 49/649 (7.5%) referred (functionally important disorders, groups 2 and 3) Hearing: 26/649 (4%) referred (11/26 = ~42% had normal hearing)	NR	High % of over-referral for diagnostic/further hearing evaluations
Kornfalt & Kohler58	1978	Physical Health of 10-year Old Children. An Epidemiological Study of School Children and a Follow-up of Previous Health Care	Scopus	Epidemiological	Children (10 years)	223	School (quiet room)	Sweden	High-income	Snellen chart	Pure tone audiometry	Snellen chart; audiometer (Tegner PTA-A) with earphones	Nurse	Vision: Visual acuity < 1.0 (6/6) on one/both eyes and not previously detected and treated were referred to ophtalmologist for further evaluation. Hearing: Impairment at two or more frequencies (thresholds > 20 dB at 1-8 kHz; > 25 dB at 250-500 Hz) on same ear referred to audiologist for further evaluation.	Vision: 35 children referred (15.7%) Hearing: 16 referred (7.2%) ; follow-up rate = 13/16 examined, 3 not followed-up, 5 had normal hearing (38% over-referral)	NR	High frequency of over-referral for further audiological evaluation indicates methode used for hearing screening needs to be re-evaluated (audiometry used had low sensitivity and specificity)
Manus et al.20	2021	Community-Based Hearing and Vision Screening in Schools in Low-Income Communities Using Mobile Health Technologies.	Pubmed	Descriptive feasibility study	Children (4-9 years; mean age 6)	9821	Schools (in extra classrooms or staffrooms). The room chosen was located away from other classrooms to minimize noise but environmental noise was continuously monitored	South Africa	Upper-middle (low-income communities)	Peek Acuity App: Tumbling E	hearScreen app; hearTest app	Smartphone based apps; for hearing screening and testing - smartphones connected to supra-aural Sennheiser HD 280 Pro headphones	CHWs	Vision: visual logMAR of 0.3 or less in both eyes or 0.4 logMAR in one eye. Participants who failed the vision screening were referred to the optometrist at the secondary hospital or a retail optometrist offering free services to children aged 6–12 years old. Caregivers were informed of the screening results with a referral letter sent home with the participant, as well as a text message. initial…	Vision: 3.6% referred after initial visual acuity screening Follow-up rates: 25.1% followed up for diagnostic vision testing Hearing: 1.6% referred after initial hearing screening Follow-up rates: 32.5% (26/80) followed up for AC threshold audiometry; 73.1% (19/26) referred to audiology services at secondary hospital of which 21.1% (4/19) attended. Program cost: Relatively low cost. Cost of scree…	mHealth technologies can enable LHWs to identify school-age children with hearing and/or vision loss in low-income communities. This approach allows for low cost, scalable models for early detection of sensory losses that can affect academic performance.	The poor follow-up rate after initial hearing screening was due to participants being unavailable or unable to attend this follow-up assessment due to examinations, classroom work, or absence from school on the day of testing. Poor follow-up could also be due to: incorrect details or change of mobile number (could not get hold of caregivers) Cost of travel and food when attending follow-up appoin…
Matteson et al.53	1993	Vision and hearing screening in cognitively impaired older adults.	Scopus	Not specified/not reported	Adults (61 -93)	49	Alzheimer special care unit (Two of the units were in a private, nonprofit nursing home, and one was in a V.A. Hospital)	USA	High-income	Snellen chart	Finger rub test	Visual acuity chart	Nurses	NR	37% of the subjects were unable to be tested for vision and hearing using relatively simple screening procedures. They could not follow directions or concentrate well enough to carry out either testing procedure.	NR	participants had difficutly understanding procedures
Miller & Stern54	1974	Vision screening and hearing in the elderly	Scopus	Not specified/not reported	Adults 60+ (median 75 years)	235	Apartment housing for the elderly (a quiet room)	USA	High-income	Snellen chart; ophtalmoscopic examination; tonometry	Pure tone audiometry	Vision: Snellen chart, opthalmoscope, tonometer. Hearing: Zenith portable pure tone audiometer with ear phones	Vision - eye technicians and doctors. Hearing - audiologist	Vision: if remediable abnormality present, referred for futher opthamology evaluation. Hearing: Pure tone index of 0.8 or 30 dB, or audiological history of subjective hearing difficulty and/or symptoms of ear pathology were referred for further evaluation at ENT and/or audiologist.	Vision: Of 119 adults, 20 (16.8%) were referred; only 1 (5%) returned for further evaluation. Hearing: Of 116 adults, 80 were referred (69%), and 14 (17.5%) attended the referral appointment.	NR	Attendance of follow-up visits: arrangements need to be made to have elder adults transported to the clinic. This could imply the use of volunteers. Resistance to treatment by older adults.
Paterson et al.46	1998	School screening in remote aboriginal communities--results of an evaluation.	Web of Science	Prospective cross-sectional study	Children (3-18 years)	1367	School	Australia	High-income	Snellen chart	Pure tone audiometry	Hearing: Portable audiometer Vision: Snellen Chart	Nurses; Aboriginal Health Workers; communicable diseases nurse; a nurse audiometrist; doctors and medical students.	NR	Follow-up, most common intervention was hearing aids.	NR	Barriers for annual hearing screening: time consuming, geographical isolation. Barriers for annual vision screening: unlikely to yield many new cases and is time consuming, younger children were unable to cooperate. General : time consuming and logistically difficult to refer to hopsitals for follow-up, confusion regarding treatment regimens
Rajput et al.68	2018	Community-based screening to detect school readiness problems in very preterm children.	Scopus	Retrospective cohort	Children (age 4)	841	Community-based	NZ & Australia	High-income	Modified Parr letter-matched or Sheridan Gardner charts.	pure tone testing	Not specified	Nurses; vision and hearing technicians with specific training	Vision: Visual acuity of 6/12 or lower in one or both eyes; a re-screen was suggested if the visual acuity was 6/9 in one but not both eyes. Hearing: > 40 dB at 1000 Hz in one/both ears. Failure to hear tones of any other intensities or frequencies was an indication for rescreening. Abnormal hearing screen: referral to GP, ear nurse or audiologist or referral based on parental language and hearin…	Vision: 9.7% (63/647) referred after screening Hearing: 25.4% (178/700) referred after screening	Community-based screening of VPT children may be useful to follow-up of these children, allowing for early intervention and support at school entry, but further information is needed about referral rates and outcomes after referral.	NR
Sharma et al.69	2011	Growth and neurosensory outcomes of preterm very low birth weight infants at 18 months of corrected age	References	Prospective cohort	Children (18 months)	31	High risk clinic of the neonatal unit of a tertiary care hospital	India	Lower-middle	Teller Acuity Chart	Screening brainstem auditory evoked response (BERA)	Vision: Teller acuity chart Hearing: Screening ABR	Vision: ophtalmologist.Hearing: trained technician	NR	NR	NR	The number of infants followed up was small. There were several children who could not undergo formal developmental assessment with DASII, BERA for formal hearing assessment and Teller acuity card test for visual assessment.
Tolchard & Stuhmiller59	2018	Outcomes of an Australian Nursing Student-led School Vision and Hearing Screening Programme	Scopus	Descriptive feasibility and survey study	Children	741	Park next to the student-led clinic ; School (screening took place in the school gymnasium)(underserved/disadvantaged community)	Australia	High-income (Community is described as underserved, asset-poor)	Snellen chart; animal chart; parental questionnaire	Otoscopy; referred for tymps; parental questionnaire	Snellen chart	Nursing students under supervision of nursing facilitator	Initial screen: any testing outside the normal range, unclear or suspicious, referred to vision or hearing specialist onsite for further testing. Vision: a letter to parents explaining the findings with a referral letter to an optometrist and prescriptions written by the nurse practitioner given to the teacher to forward to the parents for follow-up if deemed necessary. Hearing: Ear scarring, wax…	Visual screening: 14.4% failed (thus referred) Hearing screening: 18.8% referred due to some abnormal ear problem. Follow-up rates not reported.	Identificaiton of children with varying levels of vision and/or hearing difficulties in underserved, disadvantaged communities that had not been previously detected.	Follow-up was difficult or unable to be done due to families moving away or children living with relatives and lack of school nurses and resources.
CHW: Community Healthcare Workers
NR: Not Reported
NICU: Neonatal intensive care unit
